# Supplementary material for: Investigating the effect of oil binders on the paper supports via statistical analysis. Part 1: the factors that influence the resulting changes upon ageing
Source: Research Square preprint supplement (doi:10.21203/rs.3.rs-8508604/v1), 2026-01-09
Supplement: Supplementary file 1 [file 2d422ae350e846200c625b20.docx]

**Supportive File**

1. **Colourimetry CIE Lab***

**Table 1S.** ANOVA multivariant analysis/ L* value

| Univariate Tests of Significance for L* (Spreadsheet - L) Sigma-restricted parameterization Effective hypothesis decomposition | | | | | |
| --- | --- | --- | --- | --- | --- |
|  | **SS** | **Degr. of** | **MS** | **F** | **P** |
| **Intercept** | 233801.2 | 1 | 233801.2 | 9464.672 | 0.000000 |
| **ΤΙΜΕ** | 5098.5 | 6 | 849.7 | 34.399 | 0.000000 |
| **PAPER** | 18919.2 | 2 | 9459.6 | 382.940 | 0.000000 |
| **OIL** | 1205.1 | 2 | 602.6 | 24.393 | 0.000000 |
| **Error** | 1284.5 | 52 | 24.7 |  |  |

**Table 2S.** Tuckey’s HSD test: Time of ageing/ L* value

| Tukey HSD test; variable L* (Spreadsheet - L) Homogenous Groups, alpha = .05000 Error: Between MS = 24.703, df = 52.000 | | | | | | | | |
| --- | --- | --- | --- | --- | --- | --- | --- | --- |
|  | **ΤΙΜΕ** | **L*** | **1** | **2** | **3** | **4** | **5** | **6** |
| **7** | 28 | 48.83726 | **** |  |  |  |  |  |
| **6** | 21 | 50.72081 | **** | **** |  |  |  |  |
| **5** | 14 | 56.77944 |  | **** | **** |  |  |  |
| **4** | 7 | 60.56281 |  |  | **** | **** |  |  |
| **3** | 4 | 64.92241 |  |  |  | **** | **** |  |
| **2** | 2 | 68.84559 |  |  |  |  | **** | **** |
| **1** | 0 | 75.76496 |  |  |  |  |  | **** |

**Table 3S.** Tuckey’s HSD test: Paper type/ L* value

| Tukey HSD test; variable L* (Spreadsheet - L) Homogenous Groups, alpha = .05000 Error: Between MS = 24.703, df = 52.000 | | | | | |
| --- | --- | --- | --- | --- | --- |
|  | **PAPER** | **L*** | **1** | **2** | **3** |
| **3** | K | 36.63828 | **** |  |  |
| **2** | M | 70.18014 |  | **** |  |
| **1** | C | 75.93870 |  |  | **** |

**Table 4S.** Tuckey’s HSD test: Linseed oil formulation/ L* value

| Tukey HSD test; variable L* (Spreadsheet - L) Homogenous Groups, alpha = .05000 Error: Between MS = 24.703, df = 52.000 | | | | |
| --- | --- | --- | --- | --- |
|  | **OIL** | **L*** | **1** | **2** |
| **2** | RF | 56.43183 | **** |  |
| **1** | CP | 59.47586 | **** |  |
| **3** | StL | 66.84944 |  | **** |

**Table 5S.** ANOVA multivariant analysis/ a* value

| Univariate Tests of Significance for a* (Spreadsheet4) Sigma-restricted parameterization Effective hypothesis decomposition | | | | | |
| --- | --- | --- | --- | --- | --- |
|  | **SS** | **Degr. of** | **MS** | **F** | **P** |
| **Intercept** | 4073,947 | 1 | 4073,947 | 152,7035 | 0,000000 |
| **ΤΙΜΕ** | 1050,036 | 6 | 175,006 | 6,5597 | 0,000034 |
| **PAPER** | 104,517 | 2 | 52,258 | 1,9588 | 0,151295 |
| **OIL** | 250,342 | 2 | 125,171 | 4,6918 | 0,013389 |
| **Error** | 1387,298 | 52 | 26,679 |  |  |

**Table 6S.** Tuckey’s HSD test: Time of ageing/ a* value

| Tukey HSD test; variable a* (Spreadsheet4) Homogenous Groups, alpha = ,05000 Error: Between MS = 26,679, df = 52,000 | | | | | |
| --- | --- | --- | --- | --- | --- |
|  | **ΤΙΜΕ** | **a*** | **1** | **2** | **3** |
| **1** | 0 | 0,24819 |  |  | **** |
| **2** | 2 | 4,59326 | **** |  | **** |
| **3** | 4 | 6,98915 | **** | **** | **** |
| **4** | 7 | 9,42615 | **** | **** |  |
| **5** | 14 | 10,81448 | **** | **** |  |
| **7** | 28 | 11,77014 | **** | **** |  |
| **6** | 21 | 12,44919 |  | **** |  |

**Table 7S.** Tuckey’s HSD test: Paper type/ a* value

| Tukey HSD test; variable a* (Spreadsheet4) Homogenous Groups, alpha = ,05000 Error: Between MS = 26,679, df = 52,000 | | | |
| --- | --- | --- | --- |
|  | **PAPER** | **a*** | **1** |
| **2** | M | 6,778810 | **** |
| **1** | C | 7,535889 | **** |
| **3** | K | 9,809822 | **** |

**Table 8S.** Tuckey’s HSD test: Linseed oil formulation/ a* value

| Tukey HSD test; variable a* (Spreadsheet4) Homogenous Groups, alpha = ,05000 Error: Between MS = 26,679, df = 52,000 | | | | |
| --- | --- | --- | --- | --- |
|  | **OIL** | **a*** | **1** | **2** |
| **3** | StL | 5,37187 | **** |  |
| **1** | CP | 8,59192 | **** | **** |
| **2** | RF | 10,16073 |  | **** |

**Table 9S.** ANOVA multivariant analysis/ b* value

| Univariate Tests of Significance for b* (Spreadsheet4) Sigma-restricted parameterization Effective hypothesis decomposition | | | | | |
| --- | --- | --- | --- | --- | --- |
|  | **SS** | **Degr. Of** | **MS** | **F** | **p** |
| **Intercept** | 54202,62 | 1 | 54202,62 | 938,7131 | 0,000000 |
| **ΤΙΜΕ** | 647,83 | 6 | 107,97 | 1,8699 | 0,103722 |
| **PAPER** | 6886,81 | 2 | 3443,41 | 59,6349 | 0,000000 |
| **OIL** | 11,00 | 2 | 5,50 | 0,0952 | 0,909306 |

**Table 10S.** Tuckey’s HSD test: Time of ageing/ b* value

| Tukey HSD test; variable b* (Spreadsheet4) Homogenous Groups, alpha = ,05000 Error: Between MS = 57,741, df = 52,000 | | | |
| --- | --- | --- | --- |
|  | **ΤΙΜΕ** | **b*** | **1** |
| **1** | 0 | 23,41063 | **** |
| **7** | 28 | 26,98277 | **** |
| **6** | 21 | 27,35340 | **** |
| **5** | 14 | 31,26830 | **** |
| **2** | 2 | 31,55793 | **** |
| **3** | 4 | 32,01422 | **** |
| **4** | 7 | 32,73589 | **** |

**Table 11S.** Tuckey’s HSD test: Paper type/ b* value

| Tukey HSD test; variable b* (Spreadsheet4) Homogenous Groups, alpha = ,05000 Error: Between MS = 57,741, df = 52,000 | | | | | |
| --- | --- | --- | --- | --- | --- |
|  | **PAPER** | **b*** | **1** | **2** | **3** |
| **3** | K | 15,74160 | **** |  |  |
| **2** | M | 31,08222 |  | **** |  |
| **1** | C | 41,17181 |  |  | **** |

**Table 12S.** Tuckey’s HSD test: Linseed oil formulation/ b* value

| Tukey HSD test; variable b* (Spreadsheet4) Homogenous Groups, alpha = ,05000 Error: Between MS = 57,741, df = 52,000 | | | |
| --- | --- | --- | --- |
|  | **OIL** | **b*** | **1** |
| **2** | RF | 28,89105 | **** |
| **1** | CP | 29,21149 | **** |
| **3** | StL | 29,89309 | **** |

**Table 13S.** ANOVA multivariant analysis/ ΔΕ*

| Univariate Tests of Significance for ΔΕ* (Spreadsheet4) Sigma-restricted parameterization Effective hypothesis decomposition | | | | | |
| --- | --- | --- | --- | --- | --- |
|  | **SS** | **Degr. Of** | **MS** | **F** | **p** |
| **Intercept** | 31359,74 | 1 | 31359,74 | 1280,877 | 0,000000 |
| **ΤΙΜΕ** | 8549,90 | 6 | 1424,98 | 58,203 | 0,000000 |
| **PAPER** | 3109,27 | 2 | 1554,63 | 63,498 | 0,000000 |
| **OIL** | 712,80 | 2 | 356,40 | 14,557 | 0,000010 |
| **Error** | 1273,12 | 52 | 24,48 |  |  |

**Table 14S.** Tuckey’s HSD test: Time of ageing/ΔΕ*

| Tukey HSD test; variable ΔΕ* (Spreadsheet4) Homogenous Groups, alpha = ,05000 Error: Between MS = 24,483, df = 52,000 | | | | | | |
| --- | --- | --- | --- | --- | --- | --- |
|  | **ΤΙΜΕ** | **ΔΕ*** | **1** | **2** | **3** | **4** |
| **1** | 0 | 0,00000 |  |  |  | **** |
| **2** | 2 | 14,30026 |  | **** |  |  |
| **3** | 4 | 17,96541 |  | **** |  |  |
| **4** | 7 | 25,26356 |  |  | **** |  |
| **5** | 14 | 28,87870 | **** |  | **** |  |
| **6** | 21 | 34,12915 | **** |  |  |  |
| **7** | 28 | 35,63883 | **** |  |  |  |

**Table 15S.** Tuckey’s HSD test: Paper type/ ΔΕ*

| Tukey HSD test; variable ΔΕ* (Spreadsheet4) Homogenous Groups, alpha = ,05000 Error: Between MS = 24,483, df = 52,000 | | | | | |
| --- | --- | --- | --- | --- | --- |
|  | **PAPER** | **ΔΕ*** | **1** | **2** | **3** |
| **3** | KRAFT | 12,76139 | **** |  |  |
| **1** | COTTON | 24,71152 |  | **** |  |
| **2** | MONTVAL | 29,45962 |  |  | **** |

**Table 16S.** Tuckey’s HSD test: Linseed oil formulation/ ΔΕ*

| Tukey HSD test; variable ΔΕ* (Spreadsheet4) Homogenous Groups, alpha = ,05000 Error: Between MS = 24,483, df = 52,000 | | | | |
| --- | --- | --- | --- | --- |
|  | **OIL** | **ΔΕ*** | **1** | **2** |
| **3** | STAND OIL | 17,55434 |  | **** |
| **1** | COLD PRESSED | 24,63311 | **** |  |
| **2** | REFINED | 24,74508 | **** |  |

1. **Opacity**

**Table 17S.** ANOVA multivariant analysis/ Opacity measurements

| Univariate Tests of Significance for OPACITY (Spreadsheet4) Sigma-restricted parameterization Effective hypothesis decomposition | | | | | |
| --- | --- | --- | --- | --- | --- |
|  | **SS** | **Degr. of** | **MS** | **F** | **p** |
| **Intercept** | 252264,0 | 1 | 252264,0 | 7255,546 | 0,000000 |
| **ΤΙΜΕ** | 4085,0 | 6 | 680,8 | 19,582 | 0,000000 |
| **PAPER** | 16305,2 | 2 | 8152,6 | 234,483 | 0,000000 |
| **OIL** | 6372,6 | 2 | 3186,3 | 91,643 | 0,000000 |
| **Error** | 1808,0 | 52 | 34,8 |  |  |

**Table 18S.** Tuckey’s HSD test: Time of ageing/ Opacity measurements

| Tukey HSD test; variable OPACITY (Spreadsheet4) Homogenous Groups, alpha = ,05000 Error: Between MS = 34,768, df = 52,000 | | | | | | | |
| --- | --- | --- | --- | --- | --- | --- | --- |
|  | **ΤΙΜΕ** | **OPACITY** | **1** | **2** | **3** | **4** | **5** |
| **1** | 0 | 51,01481 | **** |  |  |  |  |
| **2** | 2 | 55,72407 | **** | **** |  |  |  |
| **3** | 4 | 58,88519 | **** | **** | **** |  |  |
| **4** | 7 | 64,18222 |  | **** | **** | **** |  |
| **5** | 14 | 66,28148 |  |  | **** | **** |  |
| **6** | 21 | 71,07407 |  |  |  | **** | **** |
| **7** | 28 | 75,78889 |  |  |  |  | **** |

**Table 19S.** Tuckey’s HSD test: Paper type/ Opacity measurements

| Tukey HSD test; variable OPACITY (Spreadsheet4) Homogenous Groups, alpha = ,05000 Error: Between MS = 34,768, df = 52,000 | | | | |
| --- | --- | --- | --- | --- |
|  | **PAPER** | **OPACITY** | **1** | **2** |
| **1** | Cotton | 40,52730 |  | **** |
| **2** | Montval | 74,64444 | **** |  |
| **3** | Kraft | 74,66429 | **** |  |

**Table 20S.** Tuckey’s HSD test: Linseed oil formulation/ Opacity measurements

| Tukey HSD test; variable OPACITY (Spreadsheet4) Homogenous Groups, alpha = ,05000 Error: Between MS = 34,768, df = 52,000 | | | | |
| --- | --- | --- | --- | --- |
|  | **OIL** | **OPACITY** | **1** | **2** |
| **3** | Stand-oil | 49,09476 |  | **** |
| **2** | Refined Linseed oil | 69,45397 | **** |  |
| **1** | Cold-pressed linseed oil | 71,28730 | **** |  |

1. **pH measurements**

**Table 21S.** ANOVA multivariant analysis/ pH measurements

| Univariate Tests of Significance for pH (Spreadsheet4) Sigma-restricted parameterization Effective hypothesis decomposition | | | | | |
| --- | --- | --- | --- | --- | --- |
|  | **SS** | **Degr. of** | **MS** | **F** | **p** |
| **Intercept** | 1594,399 | 1 | 1594,399 | 13061,30 | 0,000000 |
| **ΤΙΜΕ** | 0,747 | 6 | 0,125 | 1,02 | 0,422464 |
| **PAPER** | 9,714 | 2 | 4,857 | 39,79 | 0,000000 |
| **OIL** | 0,896 | 2 | 0,448 | 3,67 | 0,032283 |
| **Error** | 6,348 | 52 | 0,122 |  |  |

**Table 22S.** Tuckey’s HSD test: Time of ageing/pH measurements

| Tukey HSD test; variable pH (Spreadsheet4) Homogenous Groups, alpha = ,05000 Error: Between MS = ,12207, df = 52,000 | | | |
| --- | --- | --- | --- |
|  | **ΤΙΜΕ** | **pH** | **1** |
| **5** | 14 | 4,874444 | **** |
| **4** | 7 | 4,905556 | **** |
| **3** | 4 | 5,014333 | **** |
| **7** | 28 | 5,032111 | **** |
| **6** | 21 | 5,056667 | **** |
| **2** | 2 | 5,113556 | **** |
| **1** | 0/40 | 5,218222 | **** |

**Table 23S.** Tuckey’s HSD test: Paper type/ pH measurements

| Tukey HSD test; variable pH (Spreadsheet4) Homogenous Groups, alpha = ,05000 Error: Between MS = ,12207, df = 52,000 | | | | |
| --- | --- | --- | --- | --- |
|  | **PAPER** | **pH** | **1** | **2** |
| **1** | Cotton | 4,482571 |  | **** |
| **3** | Kraft | 5,227619 | **** |  |
| **2** | Montval | 5,381905 | **** |  |

**Table 24S.** Tuckey’s HSD test: Linseed oil formulation/ pH measurements

| Tukey HSD test; variable pH (Spreadsheet4) Homogenous Groups, alpha = ,05000 Error: Between MS = ,12207, df = 52,000 | | | | |
| --- | --- | --- | --- | --- |
|  | **OIL** | **pH** | **1** | **2** |
| **1** | Cold-pressed linseed oil | 4,866143 | **** |  |
| **3** | Stand-oil | 5,080952 | **** | **** |
| **2** | Refined Linseed oil | 5,145000 |  | **** |

1. **Tensile strength measurements**

***Table 25S.*** *ANOVA multivariant analysis/ Tensile strength measurements*

| Univariate Tests of Significance for Τensile Strength (Spreadsheet - tensile) Sigma-restricted parameterization Effective hypothesis decomposition | | | | | |
| --- | --- | --- | --- | --- | --- |
|  | **SS** | **Degr. of** | **MS** | **F** | **p** |
| **Intercept** | 1351193 | 1 | 1351193 | 17576.62 | 0.000000 |
| **ΤΙΜΕ** | 31897 | 6 | 5316 | 69.15 | 0.000000 |
| **PAPER** | 753385 | 2 | 376693 | 4900.10 | 0.000000 |
| **OIL** | 178 | 2 | 89 | 1.16 | 0.322366 |
| **Error** | 3997 | 52 | 77 |  |  |

***Table 26S.*** *Tuckey’s HSD test: Time of ageing/ Tensile strength measurements*

| Tukey HSD test; variable Τensile Strength (Spreadsheet - tensile) Homogenous Groups, alpha = .05000 Error: Between MS = 76.874, df = 52.000 | | | | | | |
| --- | --- | --- | --- | --- | --- | --- |
|  | **ΤΙΜΕ** | **Τensile Strength** | **1** | **2** | **3** | **4** |
| **7** | 28 | 115.0826 | **** |  |  |  |
| **6** | 21 | 120.3487 | **** |  |  |  |
| **5** | 14 | 134.6094 |  | **** |  |  |
| **4** | 7 | 146.3449 |  | **** |  |  |
| **3** | 4 | 161.3457 |  |  | **** |  |
| **2** | 2 | 169.7844 |  |  | **** | **** |
| **1** | 0/40 | 177.6319 |  |  |  | **** |

***Table 27S.*** *Tuckey’s HSD test: Paper type/ Tensile strength measurements*

| Tukey HSD test; variable Τensile Strength (Spreadsheet - tensile) Homogenous Groups, alpha = .05000 Error: Between MS = 76.874, df = 52.000 | | | | | |
| --- | --- | --- | --- | --- | --- |
|  | **PAPER** | **Τensile Strength** | **1** | **2** | **3** |
| **1** | Cotton | 35.0138 | **** |  |  |
| **3** | Kraft | 109.3005 |  | **** |  |
| **2** | Montval | 295.0346 |  |  | **** |

**Table 28S.** Tuckey’s HSD test: Linseed oil formulation/ Tensile strength measurements

| Tukey HSD test; variable Τensile Strength (Spreadsheet - tensile) Homogenous Groups, alpha = .05000 Error: Between MS = 76.874, df = 52.000 | | | |
| --- | --- | --- | --- |
|  | **OIL** | **Τensile Strength** | **1** |
| **3** | Stand oil | 144.3825 | **** |
| **1** | Cold-pressed linseed oil | 146.4680 | **** |
| **2** | Alkali refined | 148.4985 | **** |

1. **Emissions of Volatile Organic Compounds (VOC)**

***Table 29S.*** *ANOVA multivariant analysis/ VOC GC-MS analysis/Sum-up emissions of Acids*

| Univariate Tests of Significance for **VOC ACIDS** (Spreadsheet - VOC ACIDS) Sigma-restricted parameterization Effective hypothesis decomposition | | | | | |
| --- | --- | --- | --- | --- | --- |
|  | **SS** | **Degr. of** | **MS** | **F** | **p** |
| **Intercept** | 1.773475E+18 | 1 | 1.773475E+18 | 321.6359 | 0.000000 |
| **ΤΙΜΕ** | 4.099855E+17 | 6 | 6.833092E+16 | 12.3924 | 0.000000 |
| **PAPER** | 5.204515E+15 | 2 | 2.602258E+15 | 0.4719 | 0.626434 |
| **OIL** | 1.357627E+17 | 2 | 6.788134E+16 | 12.3109 | 0.000042 |
| **Error** | 2.867239E+17 | 52 | 5.513921E+15 |  |  |

***Table 30S.*** *Tuckey’s HSD test: Time of ageing/ VOC GC-MS analysis/ Sum-up emissions of Acids*

| Tukey HSD test; variable VOC ACIDS (Spreadsheet - VOC ACIDS) Homogenous Groups, alpha = .05000 Error: Between MS = 551E13, df = 52.000 | | | | |
| --- | --- | --- | --- | --- |
|  | **ΤΙΜΕ** | **VOC ACIDS** | **1** | **2** |
| **7** | 28 | 95819466 | **** |  |
| **6** | 21 | 101385498 | **** |  |
| **5** | 14 | 124840553 | **** |  |
| **4** | 7 | 147635022 | **** |  |
| **3** | 4 | 159628880 | **** |  |
| **2** | 2 | 196138235 | **** |  |
| **1** | 0/40 | 349017838 |  | **** |

***Table 31S.*** *Tuckey’s HSD test: Paper type/ VOC GC-MS analysis/ Sum-up emissions of Acids*

| Tukey HSD test; variable VOC ACIDS (Spreadsheet - VOC ACIDS) Homogenous Groups, alpha = .05000 Error: Between MS = 551E13, df = 52.000 | | | |
| --- | --- | --- | --- |
|  | **PAPER** | **VOC ACIDS** | **1** |
| **3** | K | 155161424 | **** |
| **2** | M | 171973669 | **** |
| **1** | C | 176207261 | **** |

***Table 32S.*** *Tuckey’s HSD test: Linseed oil formulation/ Sum-up emissions of Acids*

| Tukey HSD test; variable VOC ACIDS (Spreadsheet - VOC ACIDS) Homogenous Groups, alpha = .05000 Error: Between MS = 551E13, df = 52.000 | | | | |
| --- | --- | --- | --- | --- |
|  | **OIL** | **VOC ACIDS** | **1** | **2** |
| **3** | StL | 127126716 | **** |  |
| **2** | RF | 143466134 | **** |  |
| **1** | CP | 232749503 |  | **** |

***Table 33S.*** *ANOVA multivariant analysis/ VOC GC-MS analysis/ Sum-up emissions of Aldehydes*

| Univariate Tests of Significance for **VOC ALDEHYDES** (Spreadsheet - VOC ALDEHYDES) Sigma-restricted parameterization Effective hypothesis decomposition | | | | | |
| --- | --- | --- | --- | --- | --- |
|  | **SS** | **Degr. of** | **MS** | **F** | **p** |
| **Intercept** | 3.330608E+17 | 1 | 3.330608E+17 | 681.5670 | 0.000000 |
| **ΤΙΜΕ** | 6.190491E+16 | 6 | 1.031748E+16 | 21.1134 | 0.000000 |
| **PAPER** | 7.579949E+15 | 2 | 3.789974E+15 | 7.7557 | 0.001128 |
| **OIL** | 1.115481E+16 | 2 | 5.577406E+15 | 11.4135 | 0.000078 |
| **Error** | 2.541080E+16 | 52 | 4.886693E+14 |  |  |

**Table 34S.** Tuckey’s HSD test: Time of ageing/ VOC GC-MS analysis/ Sum-up emissions of Aldehydes

| Tukey HSD test; variable VOC ALDEHYDES (Spreadsheet - VOC ALDEHYDES#2) Homogenous Groups, alpha = .05000 Error: Between MS = 489E12, df = 52.000 | | | | | | |
| --- | --- | --- | --- | --- | --- | --- |
|  | **ΤΙΜΕ** | **VOC ALDEHYDES** | **1** | **2** | **3** | **4** |
| **6** | 28 | 34709774 | **** |  |  |  |
| **7** | 21 | 35753686 | **** |  |  |  |
| **5** | 14 | 51053098 | **** | **** |  |  |
| **4** | 7 | 77249334 |  | **** |  |  |
| **3** | 4 | 81472004 |  | **** | **** |  |
| **2** | 2 | 110368258 |  |  | **** | **** |
| **1** | 0/40 | 118360766 |  |  |  | **** |

***Table 35S.*** *Tuckey’s HSD test: Paper type/ VOC GC-MS analysis/ Sum-up emissions of Aldehydes*

| Tukey HSD test; variable VOC ALDEHYDES (Spreadsheet - VOC ALDEHYDES#2) Homogenous Groups, alpha = .05000 Error: Between MS = 489E12, df = 52.000 | | | | |
| --- | --- | --- | --- | --- |
|  | **PAPER** | **VOC ALDEHYDES** | **1** | **2** |
| **3** | K | 57791223 |  | **** |
| **2** | M | 76486694 | **** |  |
| **1** | C | 83850763 | **** |  |

**Table 36S.** Tuckey’s HSD test: Linseed oil formulation/ Sum-up emissions of Aldehydes

| Tukey HSD test; variable VOC ALDEHYDES (Spreadsheet - VOC ALDEHYDES#2) Homogenous Groups, alpha = .05000 Error: Between MS = 489E12, df = 52.000 | | | | |
| --- | --- | --- | --- | --- |
|  | **OIL** | **VOC ALDEHYDES** | **1** | **2** |
| **2** | RF | 63062500 | **** |  |
| **1** | CP | 63540540 | **** |  |
| **3** | StL | 91525639 |  | **** |

***Table 37S.*** *ANOVA multivariant analysis/ VOC GC-MS analysis/ Sum-up emissions of Ketones*

| Univariate Tests of Significance for VOC KETONES (Spreadsheet - KETONES) Sigma-restricted parameterization Effective hypothesis decomposition | | | | | |
| --- | --- | --- | --- | --- | --- |
|  | **SS** | **Degr. of** | **MS** | **F** | **p** |
| **Intercept** | 4.834251E+16 | 1 | 4.834251E+16 | 251.1021 | 0.000000 |
| **ΤΙΜΕ** | 1.859684E+16 | 6 | 3.099474E+15 | 16.0994 | 0.000000 |
| **PAPER** | 1.715134E+16 | 2 | 8.575671E+15 | 44.5440 | 0.000000 |
| **OIL** | 4.446263E+14 | 2 | 2.223132E+14 | 1.1547 | 0.323086 |
| **Error** | 1.001111E+16 | 52 | 1.925213E+14 |  |  |

**Table 38S.** Tuckey’s HSD test: Time of ageing/ VOC GC-MS analysis/ Sum-up emissions of Ketones

| Tukey HSD test; variable VOC KETONES (Spreadsheet - KETONES) Homogenous Groups, alpha = .05000 Error: Between MS = 193E12, df = 52.000 | | | | | |
| --- | --- | --- | --- | --- | --- |
|  | **ΤΙΜΕ** | **VOC KETONES** | **1** | **2** | **3** |
| **7** | 28 | 11676546 | **** |  |  |
| **6** | 21 | 12644058 | **** |  |  |
| **5** | 14 | 17831538 | **** |  |  |
| **4** | 7 | 23480194 | **** | **** |  |
| **3** | 4 | 23978910 | **** | **** |  |
| **2** | 2 | 40779455 |  | **** |  |
| **1** | 0/40 | 63515797 |  |  | **** |

**Table 39S.** Tuckey’s HSD test: Paper type/ VOC GC-MS analysis/ Sum-up emissions of Ketones

| Tukey HSD test; variable VOC KETONES (Spreadsheet – KETONES) Homogenous Groups, alpha = .05000 Error: Between MS = 193E12, df = 52.000 | | | | |
| --- | --- | --- | --- | --- |
|  | **PAPER** | **VOC KETONES** | **1** | **2** |
| **3** | K | 13909121 | **** |  |
| **2** | M | 18296377 | **** |  |
| **1** | C | 50897286 |  | **** |

**Table 40S.** Tuckey’s HSD test: Linseed oil formulation/ Sum-up emissions of Ketones

| Tukey HSD test; variable VOC KETONES (Spreadsheet - KETONES) Homogenous Groups, alpha = .05000 Error: Between MS = 193E12, df = 52.000 | | | |
| --- | --- | --- | --- |
|  | **OIL** | **VOC KETONES** | **1** |
| **3** | StL | 25490764 | **** |
| **1** | CP | 26174904 | **** |
| **2** | RF | 31437117 | **** |

***Table 41S.*** *ANOVA multivariant analysis/ VOC GC-MS analysis/ Sum-up emissions of Furans*

| Univariate Tests of Significance for VOC FURANS (Spreadsheet - OILED PAPERS) Sigma-restricted parameterization Effective hypothesis decomposition | | | | | |
| --- | --- | --- | --- | --- | --- |
|  | **SS** | **Degr. of** | **MS** | **F** | **p** |
| **Intercept** | 2.567450E+16 | 1 | 2.567450E+16 | 325.9213 | 0.000000 |
| **ΤΙΜΕ** | 4.681832E+15 | 6 | 7.803053E+14 | 9.9055 | 0.000000 |
| **PAPER** | 2.739769E+15 | 2 | 1.369884E+15 | 17.3898 | 0.000002 |
| **OIL** | 2.993796E+15 | 2 | 1.496898E+15 | 19.0022 | 0.000001 |
| **Error** | 4.096307E+15 | 52 | 7.877514E+13 |  |  |

***Table 42S.*** *Tuckey’s HSD test: Time of ageing// VOC GC-MS analysis/ Sum-up emissions of Furans*

| Tuckey HSD test; variable VOC FURANS (Spreadsheet - OILED PAPERS) Homogenous Groups, alpha = .05000 Error: Between MS = 788E11, df = 52.000 | | | | | | |
| --- | --- | --- | --- | --- | --- | --- |
|  | **ΤΙΜΕ** | **VOC FURANS** | **1** | **2** | **3** | **4** |
| **7** | 28 | 7289741 |  | **** |  |  |
| **6** | 21 | 10069486 |  | **** | **** |  |
| **5** | 14 | 16495932 |  | **** | **** | **** |
| **4** | 7 | 22235633 | **** |  | **** | **** |
| **3** | 4 | 24028164 | **** |  |  | **** |
| **2** | 2 | 29545139 | **** |  |  |  |
| **1** | 0/40 | 31647801 | **** |  |  |  |

**Table 43S.** Tuckey’s HSD test: Paper type/ VOC GC-MS analysis/ Sum-up emissions of Furans

| Tukey HSD test; variable VOC FURANS (Spreadsheet - OILED PAPERS) Homogenous Groups, alpha = .05000 Error: Between MS = 788E11, df = 52.000 | | | | | |
| --- | --- | --- | --- | --- | --- |
|  | **PAPER** | **VOC FURANS** | **1** | **2** | **3** |
| **1** | C | 12555319 | **** |  |  |
| **3** | K | 19361702 |  | **** |  |
| **2** | M | 28645221 |  |  | **** |

**Table 44S.** Tuckey’s HSD test: Linseed oil formulation/ Sum-up emissions of Furans

| Tukey HSD test; variable VOC FURANS (Spreadsheet - OILED PAPERS) Homogenous Groups, alpha = .05000 Error: Between MS = 788E11, df = 52.000 | | | | |
| --- | --- | --- | --- | --- |
|  | **OIL** | **VOC FURANS** | **1** | **2** |
| **3** | StL | 10455353 |  | **** |
| **2** | RF | 24557348 | **** |  |
| **1** | CP | 25549540 | **** |  |

***Table 45S.*** *Factor coordinates of the variables, based on correlations*

|  | ***Factor 1*** | ***Factor 2*** | ***Factor 3*** | ***Factor 4*** | ***Factor 5*** | ***Factor 6*** | ***Factor 7*** | ***Factor 8*** | ***Factor 9*** | ***Fact.10*** | ***Fact.11*** |
| --- | --- | --- | --- | --- | --- | --- | --- | --- | --- | --- | --- |
| **VOC ACIDS** | 0.626671 | -0.421111 | -0.019269 | 0.480582 | -0.170932 | -0.305293 | 0.249656 | -0.115862 | -0.020274 | 0.005786 | 0.000652 |
| **VOC ALDEHYDES** | 0.875279 | -0.219408 | -0.030821 | -0.029334 | 0.094907 | 0.263206 | -0.089829 | -0.298267 | 0.090283 | 0.008241 | 0.019977 |
| **VOC KETONES** | 0.843331 | 0.138611 | 0.122668 | 0.124189 | 0.172290 | -0.324274 | -0.318641 | 0.028624 | -0.030049 | -0.014043 | -0.028648 |
| **VOC FURANS** | 0.189993 | -0.627564 | -0.438059 | 0.518359 | 0.137959 | 0.192062 | -0.033685 | 0.204918 | 0.100896 | -0.010554 | -0.011642 |
| **pH** | -0.267642 | -0.723400 | 0.001657 | -0.448613 | 0.334498 | -0.265009 | 0.082561 | 0.007810 | 0.117055 | 0.027516 | 0.018671 |
| **ΔΕ** | -0.519714 | 0.446298 | -0.638863 | -0.027279 | -0.221454 | -0.169100 | -0.065294 | -0.094364 | 0.166046 | -0.050352 | -0.030239 |
| **L*** | 0.817614 | 0.122838 | -0.443981 | -0.263142 | -0.137869 | -0.049221 | -0.000426 | 0.119612 | -0.023272 | -0.081384 | 0.084577 |
| **a*** | -0.701020 | 0.400495 | -0.173195 | 0.370767 | 0.387832 | -0.041284 | 0.025518 | -0.109484 | -0.064330 | -0.100732 | 0.040859 |
| **b*** | 0.361937 | 0.648519 | -0.608937 | -0.027620 | 0.192823 | -0.008921 | 0.089766 | 0.007715 | -0.042670 | 0.172134 | -0.005365 |
| **OPACITY** | -0.761354 | -0.503337 | -0.131600 | 0.196666 | -0.187004 | -0.075074 | -0.222326 | -0.052495 | -0.043062 | 0.113566 | 0.058761 |
| **TENSILE** | -0.081829 | -0.720957 | -0.599343 | -0.266887 | 0.007234 | 0.042990 | -0.023620 | -0.077524 | -0.171920 | -0.052451 | -0.048030 |

**Table 46S.** Eigenvalues of correlation matrix, and related statistics.

|  | **Eigenvalue** | **% Total** | **Cumulative** | **Cumulative** |
| --- | --- | --- | --- | --- |
| **1** | 4.125143 | 37.50130 | 4.12514 | 37.5013 |
| **2** | 2.730205 | 24.82004 | 6.85535 | 62.3213 |
| **3** | 1.590865 | 14.46240 | 8.44621 | 76.7837 |
| **4** | 1.035318 | 9.41198 | 9.48153 | 86.1957 |
| **5** | 0.489498 | 4.44998 | 9.97103 | 90.6457 |
| **6** | 0.415039 | 3.77308 | 10.38607 | 94.4188 |
| **7** | 0.242840 | 2.20764 | 10.62891 | 96.6264 |
| **8** | 0.189282 | 1.72075 | 10.81819 | 98.3472 |
| **9** | 0.098830 | 0.89845 | 10.91702 | 99.2456 |
| **10** | 0.065751 | 0.59774 | 10.98277 | 99.8434 |
| **11** | 0.017230 | 0.15664 | 11.00000 | 100.0000 |
